# Supplementary material for: Air-interfaced colonization model suggests a commensal-like interaction of Neisseria meningitidis with the epithelium, which benefit from colonization by Streptococcus mitis
Source: bioRxiv or medRxiv preprint supplement (doi:10.1101/690610), 2019-07-02

Air Interface

A

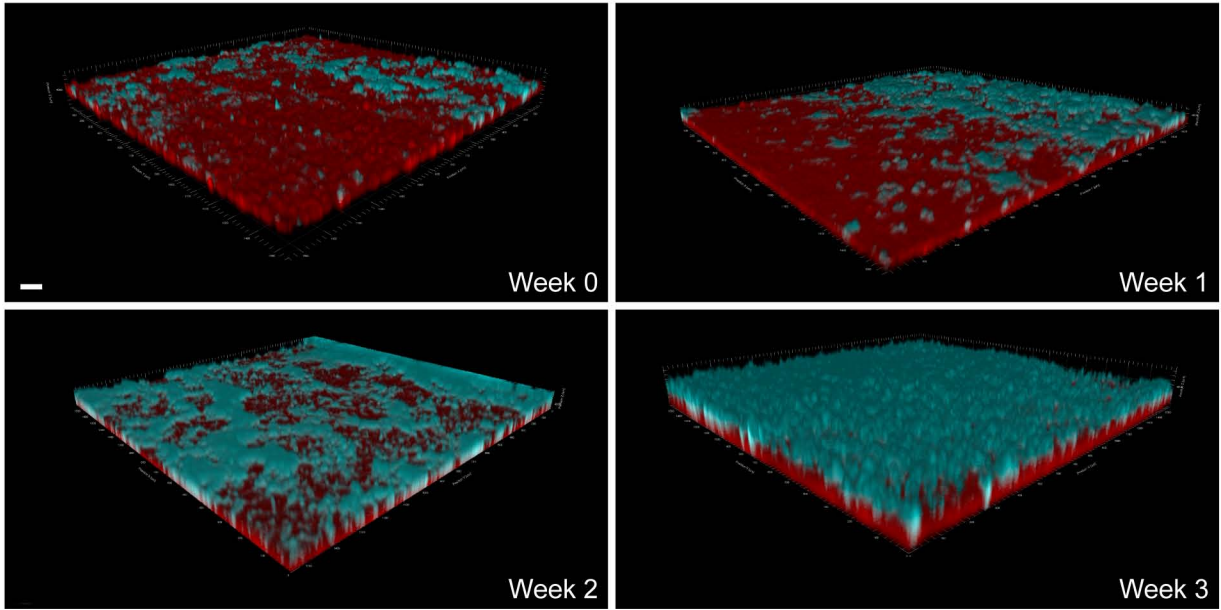

B

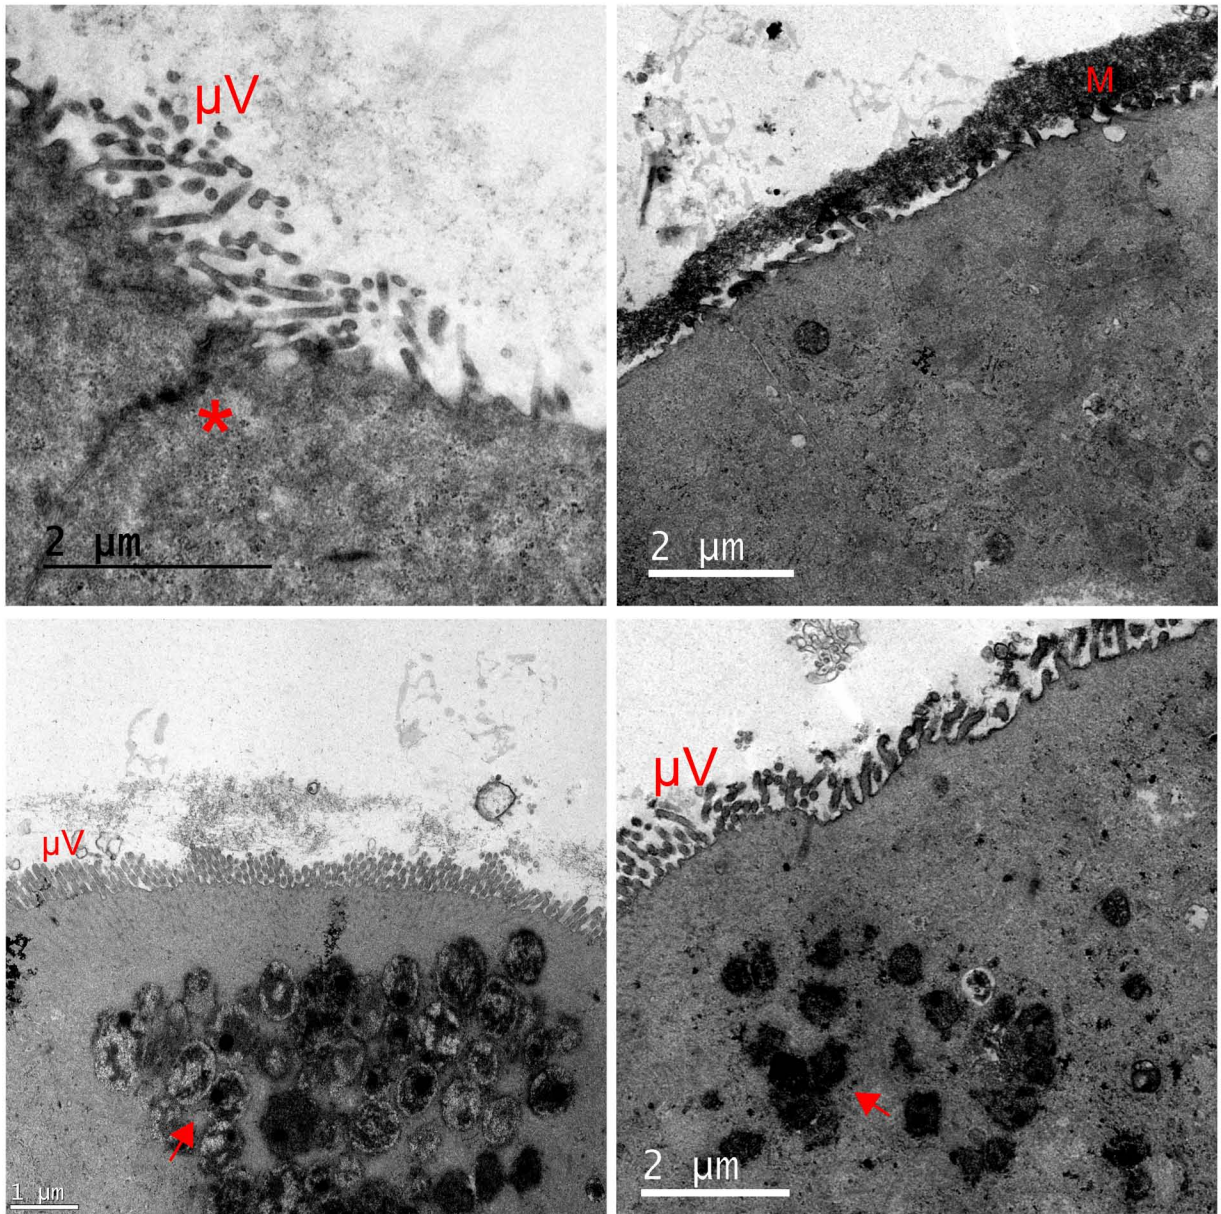

A

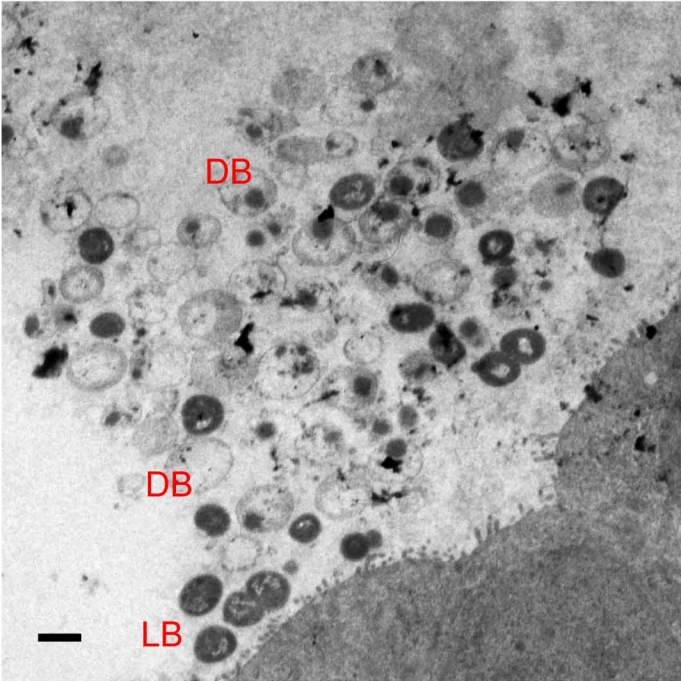

B

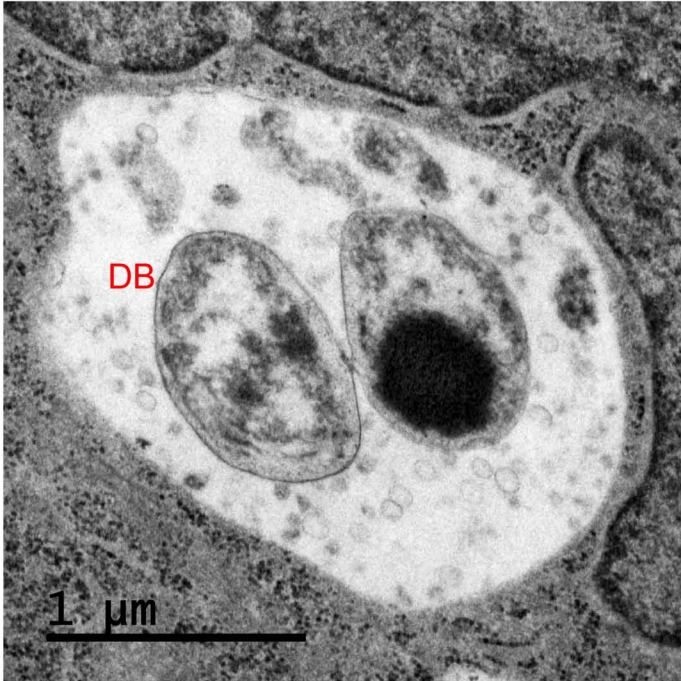

SUPPLEMENTARY FIGURE 3

A

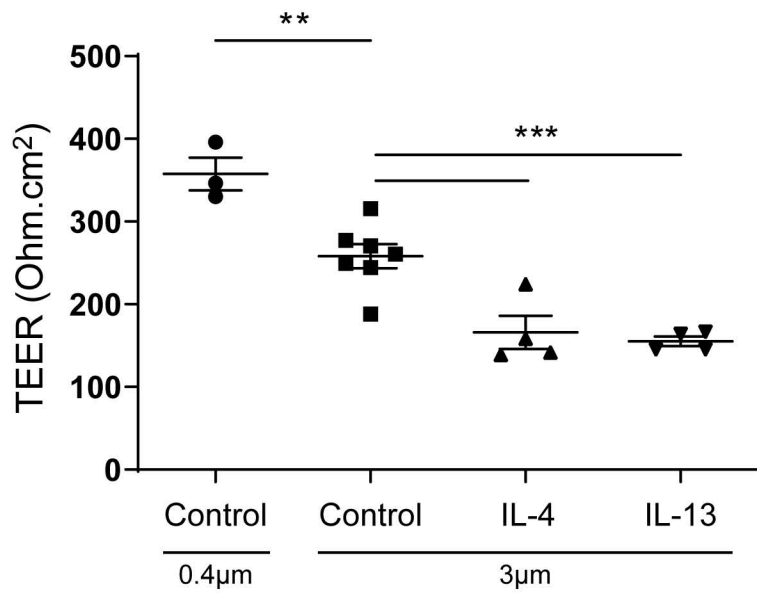

B

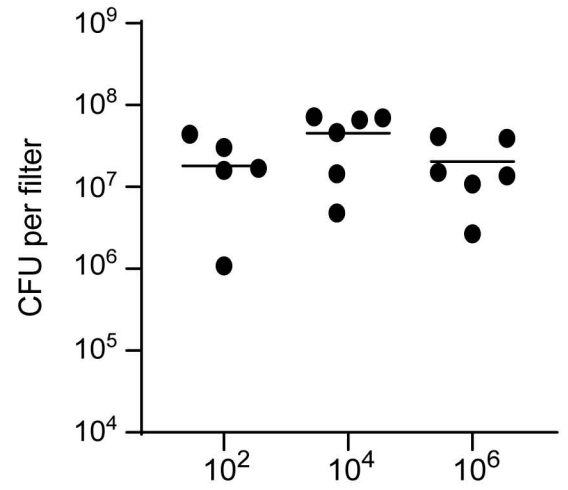

C

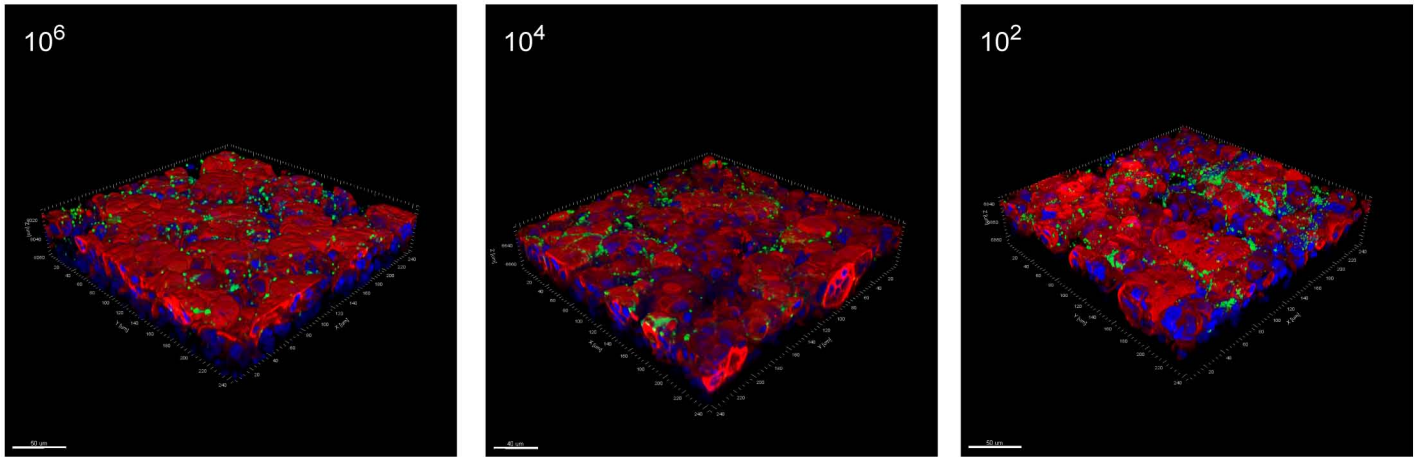

SUPPLEMENTARY FIGURE 4

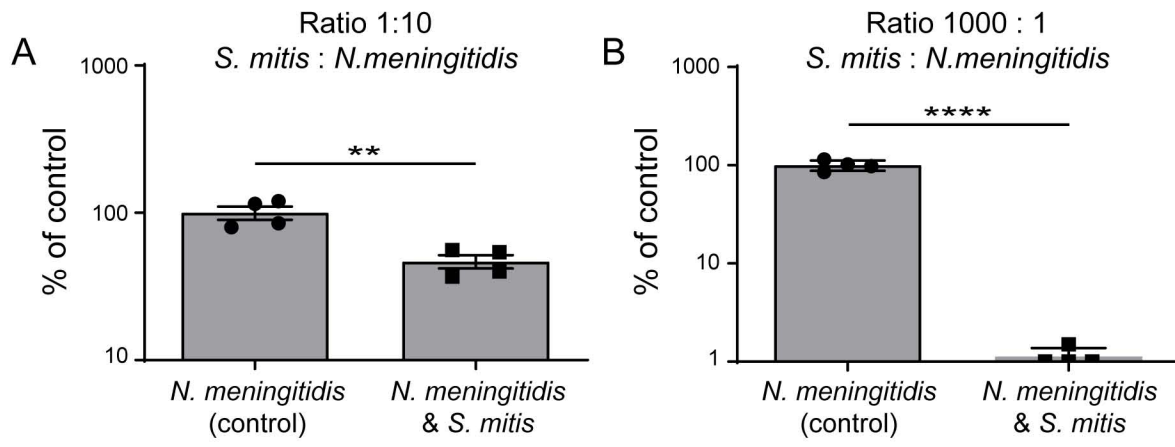

Supplement: Supplementary file [file media-1.pdf]
